# Supplementary material
Source: HighWire-hosted journal article supplement (https://srh.bmj.com/content/bmjsrh-2017-101798)
Supplement: inline-supplementary-material-1 [file inline-supplementary-material-1.pdf]

# **Acceptability of intrauterine contraception: a mixed methods study**

## **Qualitative Interviews**

### **Draft Topic Guide**

**These are topics to be covered in the qualitative interviews. The questions are to be formulated according to the interview situation, and the language used by the respondent. Probes and prompts should also be used throughout the interview.**

#### **1. Introduction**

Can you tell me a little bit about yourself?

- age
- where you live
- who you live with
- relationship
- children
- what you do (work or study)
- educational level
- religious affiliation
- ethnicity

#### **2. Have you ever been offered the coil?**

When? Reasons?

#### **3. Have you ever considered a coil?**

If not, why not?

If yes, why did you decide against it?

Who would it be suitable for?

#### **4. What do you know about the coil? What are your views on the coil?**

What are the benefits?

What are the disadvantages?

What do you know about the copper coil/ IUD?

What do you know about Mirena (hormonal coil)/IUS?

What anxieties do you have (if any) about the coil in general; IUD; IUS?

#### **5. What else have you heard about the coil?**

#### **6. How do you think the coil effects your periods?**

#### **7. Accessing IUC**

How easy do you think it would be to arrange to have an IUC fitted?

How long do you think it would take to have an IUC fitted?

What do you think it is like to have an IUD fitted? Is there anything which concerns you?

Where do you think you would have to go to get a coil?

**8. Can you talk me through the different contraceptives you have used over the years?**

**9. What are your experiences with different types of contraception?**

Hormonal

Barrier methods

Other e.g. FAM/withdraw

**10. (If applicable) Why did you stop/swap methods? How did you make your decisions?**

**11. Where do you go to get contraception? Have you ever been anywhere different?**

**12. Do you know about any other methods of contraception? What do you know?**

Where was this knowledge obtained? i.e. the experiences of others, urban myths, other information sources

**13. What do you think about the types of contraception available?**

What are your views on hormonal contraception?

Non-hormonal?

**14. Can you recall ever taking a risk with contraception?**

EHC?

Contraception after risk-taking?

Unintended pregnancy?

**15. What is important to you in a contraceptive?**

Ease of use, side-effects, bleeding pattern, reliability etc.

**16. What about the effect of contraception on your bleeding patterns?**

**17. Have your contraceptives needs changed over the years? How?**

With/without children? Different sexual relationships? Spacing children Etc.

**18. What do you think about long-acting contraception? What is a good length of time? What do you know about how long the IUD/IUC last?**

**19. Anything else to add?**
