# Supplementary material
Source: HighWire-hosted journal article supplement (https://srh.bmj.com/content/bmjsrh-2017-101798)
Supplement: inline-supplementary-material-2 [file inline-supplementary-material-2.pdf]

| Alias   | Age | Interview    | Children | Ethnicity                  |
|---------|-----|--------------|----------|----------------------------|
| Megan   | 19  | Face-to-face | 0        | White British (WB)         |
| Adele   | 21  | Face-to-face | 0        | WB                         |
| Jessica | 34  | Face-to-face | 2        | WB                         |
| Trina   | 19  | Face-to-face | 0        | WB                         |
| Zoe     | 20  | Telephone    | 0        | WB                         |
| Susie   | 21  | Telephone    | 0        | WB                         |
| Miriam  | 45  | Face-to-face | 2        | WB                         |
| Abbie   | 21  | Face-to-face | 0        | WB                         |
| Bea     | 26  | Telephone    | 0        | WB                         |
| Alison  | 35  | Telephone    | 0        | WB                         |
| Lexi    | 19  | Face-to-face | 0        | WB                         |
| Lisa    | 27  | Telephone    | 0        | WB                         |
| Ellen   | 35  | Telephone    | 3        | WB                         |
| Cheryl  | 32  | Telephone    | 1        | WB                         |
| Verity  | 37  | Face-to-face | 2        | WB                         |
| Carly   | 26  | Telephone    | 0        | WB                         |
| Lucy    | 28  | Telephone    | 0        | WB                         |
| Fiona   | 28  | Telephone    | 0        | WB                         |
| Pippa   | 22  | Telephone    | 0        | WB                         |
| Sofia   | 25  | Telephone    | 1        | Latin American             |
| Amy     | 22  | Telephone    | 0        | Mixed English and Armenian |
| Helen   | 18  | Telephone    | 0        | WB                         |
| Linda   | 36  | Telephone    | 0        | Not known                  |
| Dawn    | 41  | Face-to-face | 1        | WB                         |
| Anjie   | 27  | Face-to-face | 2        | WB                         |

|        |    |              |   |    |
|--------|----|--------------|---|----|
| Imogen | 33 | Face-to-face | 2 | WB |
| Fran   | 35 | Face-to-face | 0 | WB |
| Maria  | 19 | Telephone    | 0 | WB |
| Sadie  | 29 | Telephone    | 0 | WB |
| Gail   | 43 | Telephone    | 4 | WB |
