# Supplementary material
Source: HighWire-hosted journal article supplement (https://srh.bmj.com/content/bmjsrh-2017-101798)
Supplement: inline-supplementary-material-3 [file inline-supplementary-material-3.pdf]

## Questionnaire on copper 'coils' and Mirena (Intra-uterine contraception )

ID No. <<>>

This survey is about the kind of contraception that sits in the womb.

These types of contraception are called intra-uterine contraception, but are frequently referred to as contraceptive coils.

There are two types of intra-uterine contraception.

1. One type is a copper coil.

This is also known as an intra-uterine device (IUD).

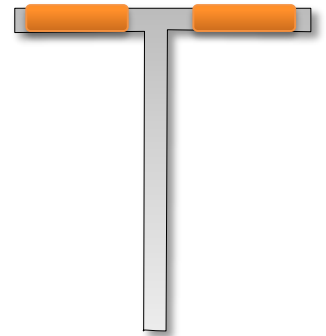

2. Another type is often referred to by its trade name Mirena, or is sometimes called the intra-uterine system (IUS).

This is a hormonal device that sits in the womb.

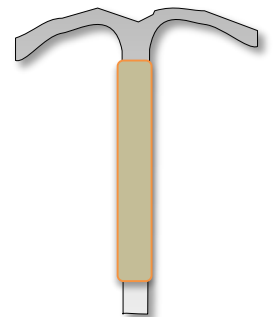

In this questionnaire we will use the terms “copper coil” and “Mirena”

The Participant Information Sheet that came with this questionnaire will give you more details about why this research is being conducted and what will happen to the questionnaire if you fill it in. Please read through it before deciding whether to take part.

Please answer all the questions if you can, but remember you can leave out any question that you do not want to answer.

When you have finished please put the questionnaire in the box marked ‘Completed Questionnaires’. The receptionist can point it out to you.

What is today's date?  /  This helps us to record our responses.

*We would like to start by asking you some details about yourself. This helps us compare your answers with those of other people to get a fuller picture.*

|                                                    |  |
|----------------------------------------------------|--|
| 1. What age are you?                               |  |
| 2. Which ethnicity do you feel best describes you? |  |

**The next question is about BOTH kinds of intra-uterine contraception, either a copper coil or Mirena.**

Please circle your answers e.g.

|     |                                     |          |
|-----|-------------------------------------|----------|
| YES | <input checked="" type="radio"/> NO | Not sure |
|-----|-------------------------------------|----------|

|                                                                                                                   |        |             |          |                |
|-------------------------------------------------------------------------------------------------------------------|--------|-------------|----------|----------------|
| 3. Have you ever used either a copper coil or Mirena?                                                             | YES    | NO          | Not sure |                |
| 4. If you answered YES, what type have you used?                                                                  | Mirena | Copper coil | Both     | Not sure       |
| 5. How much do you feel you know about copper coils or Mirena ?                                                   | A lot  | Some        | A little | Almost nothing |
| 6. Is intra-uterine contraception (copper coils or Mirena) a type of contraception that you might consider using? | YES    | NO          | Not sure |                |

*Copper coils and Mirena are very long-acting and are effective for many years without needing to be replaced. Please tell us whether you personally would consider this a good or bad feature of this type of contraception.*

|                                                                     |                     |                |                      |               |                    |
|---------------------------------------------------------------------|---------------------|----------------|----------------------|---------------|--------------------|
| 7. I think the fact that copper coils and Mirena are long-acting is | A very good feature | A good feature | Neither good nor bad | A bad feature | A very bad feature |
|---------------------------------------------------------------------|---------------------|----------------|----------------------|---------------|--------------------|

*Some people have heard about the copper 'coil' or Mirena from other people that they know.*

*Please tell us what you have heard.*

|                                                                                   |           |      |                      |     |          |              |                            |
|-----------------------------------------------------------------------------------|-----------|------|----------------------|-----|----------|--------------|----------------------------|
| 8. The experiences of other people that I know when using a copper coil have been | Very good | Good | Neither good nor bad | Bad | Very bad | I don't know | No-one I know has used one |
| 9. The experiences of other people that I know when using Mirena have been        | Very good | Good | Neither good nor bad | Bad | Very bad | I don't know | No-one I know has used one |

We interviewed some women about their thoughts on BOTH copper coils and Mirena and listed below are some of the things they said.

Please tell us how much you agree or disagree with each statement. Please circle your answers.

|                                                                                                       | Strongly agree | Agree | Neither agree nor disagree | Disagree | Strongly Disagree |            |
|-------------------------------------------------------------------------------------------------------|----------------|-------|----------------------------|----------|-------------------|------------|
| <b>Example – if you AGREE with the statement, mark the arrow like this</b>                            |                |       |                            |          |                   | Don't know |
| 10. Having to make a special appointment for fitting puts me off using a copper coil or Mirena.       |                |       |                            |          |                   | Don't know |
| 11. The fitting of a copper coil or Mirena would be painful.                                          |                |       |                            |          |                   | Don't know |
| 12. Having to have a copper coil or Mirena fitted would be embarrassing.                              |                |       |                            |          |                   | Don't know |
| 13. I don't like having to ask a nurse or doctor to remove it if you don't want it any more.          |                |       |                            |          |                   | Don't know |
| 14. I worry that removal of a copper coil or Mirena would be unpleasant.                              |                |       |                            |          |                   | Don't know |
| 15. I worry that it will damage my womb.                                                              |                |       |                            |          |                   | Don't know |
| 16. I worry that it will make it harder to get pregnant in the future.                                |                |       |                            |          |                   | Don't know |
| 17. I worry that it will move inside me.                                                              |                |       |                            |          |                   | Don't know |
| 18. I worry that my partner will feel it during sex.                                                  |                |       |                            |          |                   | Don't know |
| 19. I worry that it will fall out.                                                                    |                |       |                            |          |                   | Don't know |
| 20. I don't like the thought of having something like that inside me.                                 |                |       |                            |          |                   | Don't know |
| 21. I worry that if I got pregnant with the copper coil or Mirena in place, it might damage the baby. |                |       |                            |          |                   | Don't know |

Only one type of intra-uterine contraception has hormones in it. This is the Mirena device, which releases hormones as it sits in the womb.

**The next set of questions is about Mirena. Please circle your answers.**

|                                                                                                           |                      |                        |                               |                         |                      |
|-----------------------------------------------------------------------------------------------------------|----------------------|------------------------|-------------------------------|-------------------------|----------------------|
| 22. What does having hormones in a contraceptive device like Mirena make you feel about using the method? | It puts me off a lot | It put me off a little | It doesn't change my feelings | It attracts me a little | It attracts me a lot |
|-----------------------------------------------------------------------------------------------------------|----------------------|------------------------|-------------------------------|-------------------------|----------------------|

*The Mirena device can cause light but irregular periods.*

|                                                         |                      |                        |                               |                         |                      |
|---------------------------------------------------------|----------------------|------------------------|-------------------------------|-------------------------|----------------------|
| 23. How does this make you feel about using the method? | It puts me off a lot | It put me off a little | It doesn't change my feelings | It attracts me a little | It attracts me a lot |
|---------------------------------------------------------|----------------------|------------------------|-------------------------------|-------------------------|----------------------|

*Some women who use the Mirena device find their periods stop completely.*

|                                                         |                      |                        |                               |                         |                      |
|---------------------------------------------------------|----------------------|------------------------|-------------------------------|-------------------------|----------------------|
| 24. How does this make you feel about using the method? | It puts me off a lot | It put me off a little | It doesn't change my feelings | It attracts me a little | It attracts me a lot |
|---------------------------------------------------------|----------------------|------------------------|-------------------------------|-------------------------|----------------------|

*We are interested in the reasons why women do not use copper coils or the Mirena.*

25. Please tell us what is the main reason why you would not use these methods?

|  |
|--|
|  |
|--|

*We would like to ask you some more personal questions about yourself. You do not need to answer if you do not want to, but if you do it helps us get a fuller picture of how women feel about copper coils and Mirena.*

|                                                             |     |    |                   |
|-------------------------------------------------------------|-----|----|-------------------|
| 26. What type of contraception are you using at the moment? |     |    |                   |
| 27. Have you ever had a baby?                               | YES | NO | Prefer not to say |
| 28. Have you ever become pregnant when you did not want to? | YES | NO | Prefer not to say |
| 29. What is the first part of your postcode? e.g. AB12      |     |    | Prefer not to say |

This is the end of the questionnaire.

Thank you for answering our questionnaire and helping with our research.

If you are happy with us using your answers in our research project, please put the finished questionnaire into the box marked 'Completed Questionnaires'. The receptionist can point it out to you. **Please be sure that you want us to use your answers before you put the questionnaire in the box. Because it is anonymous, and you have not been asked for your name, we have no way of returning it to you, once you have put it in the box, if you change your mind.**
