# Supplementary material
Source: HighWire-hosted journal article supplement (https://srh.bmj.com/content/bmjsrh-2017-101798)
Supplement: inline-supplementary-material-4 [file inline-supplementary-material-4.pdf]

| Supplementary Table . Demographics of Survey Respondents who had NEVER used IUC |                           |                  |
|---------------------------------------------------------------------------------|---------------------------|------------------|
|                                                                                 |                           | Count (%)        |
| Ethnicity                                                                       |                           |                  |
|                                                                                 | White British             | 693 (79.4)       |
|                                                                                 | Other White               | 86 (9.9)         |
|                                                                                 | British Asian             | 23 (2.6)         |
|                                                                                 | Black British/Black Other | 10 (1.1)         |
|                                                                                 | Mixed/Other               | 21 (2.4)         |
|                                                                                 | Missed                    | 40 (4.6)         |
| <i>Total</i>                                                                    |                           | <i>873 (100)</i> |
| Have you ever become pregnant when you did not want to?                         |                           |                  |
|                                                                                 | YES                       | 143 (16.4)       |
|                                                                                 | NO                        | 684 (78.4)       |
|                                                                                 | Prefer not to say         | 46 (5.3)         |
| <i>Total</i>                                                                    |                           | <i>873 (100)</i> |
| Have you ever had a baby?                                                       |                           |                  |
|                                                                                 | YES                       | 433 (49.6)       |
|                                                                                 | NO                        | 409 (46.8)       |
|                                                                                 | Prefer not to say         | 31 (3.6)         |
| <i>Total</i>                                                                    |                           | <i>873 (100)</i> |
| Age Bands                                                                       |                           |                  |
|                                                                                 | 18-19 years               | 45 (5.2)         |
|                                                                                 | 20-29 years               | 321 (36.8)       |

|              |             |                  |
|--------------|-------------|------------------|
|              | 30-39 years | 291 (33.3)       |
|              | 40-49 years | 216 (24.7)       |
| <i>Total</i> | <i>873</i>  | <i>873 (100)</i> |

Note on Sample Size:

The sample size for the survey was calculated with the aim of achieving an acceptable level of precision in the estimation of proportions. A half-length of 3% for the 95% confidence interval was chosen as an appropriate level of precision, and the sample size was obtained by inverting the formula for the confidence limits for a single proportion as in Lemeshow S, Hosmer DW Jr, Klar J, Lwanga SK. Adequacy of Sample Size in Health Studies, John Wiley & Sons, Chichester, 1990, ISBN 0 471 92517 9.].
